# Supplementary material for: Lignification-mimetic dehydrogenative diphenoquinone synthesis and electrochemical CO 2 capture
Source: Royal Society of Chemistry journal article supplement (doi:10.1039/d5gc05304h), 2026-01-01
Supplement: d5gc05304h1.pdf [file d5gc05304h1.pdf]

Caption for Supporting Movie 1

**Movie S1.** In situ observation of lignification-mimetic diphenoquinone synthesis from syringol under aqueous enzymatic conditions. The reaction was recorded in vitro and is shown at 7× play speed, highlighting product formation via the dehydrogenative radical coupling reaction.
